# Supplementary material
Source: ML conference proceedings conference paper supplement (https://proceedings.neurips.cc/paper_files/paper/2015/hash/86df7dcfd896fcaf2674f757a2463eba-Abstract.html)
Supplement: Supplementary file 1 [file 86df7dcfd896fcaf2674f757a2463eba-Supplemental.zip]

## Supplementary Materials

### A Timing comparison

#### A.1 Median Speed-up

Table 4: Median speed-up ratio over CONCORD method and (standard deviation).

| p    | n    | Relative to concord |              |
|------|------|---------------------|--------------|
|      |      | ccista_0            | ccfista_1    |
| 1000 | 250  | 0.6 ( 0.7)          | 0.4 ( 0.3)   |
| 1000 | 750  | 3.4 ( 1.8)          | 1.9 ( 0.9)   |
| 1000 | 1250 | 23.1 ( 5.7)         | 12.0 ( 3.5)  |
| 3000 | 750  | 2.7 ( 2.1)          | 1.9 ( 1.6)   |
| 3000 | 2250 | 12.8 ( 1.6)         | 8.8 ( 2.2)   |
| 3000 | 3750 | 81.9 ( 6.6)         | 58.2 ( 8.7)  |
| 5000 | 1250 | 5.6 ( 3.2)          | 3.0 ( 1.8)   |
| 5000 | 3750 | 21.1 ( 2.6)         | 13.5 ( 2.6)  |
| 5000 | 6250 | 145.8 ( 6.6)        | 110.1 (16.4) |

#### A.2 Comparison among CONCORD-ISTA and CONCORD-FISTA variations

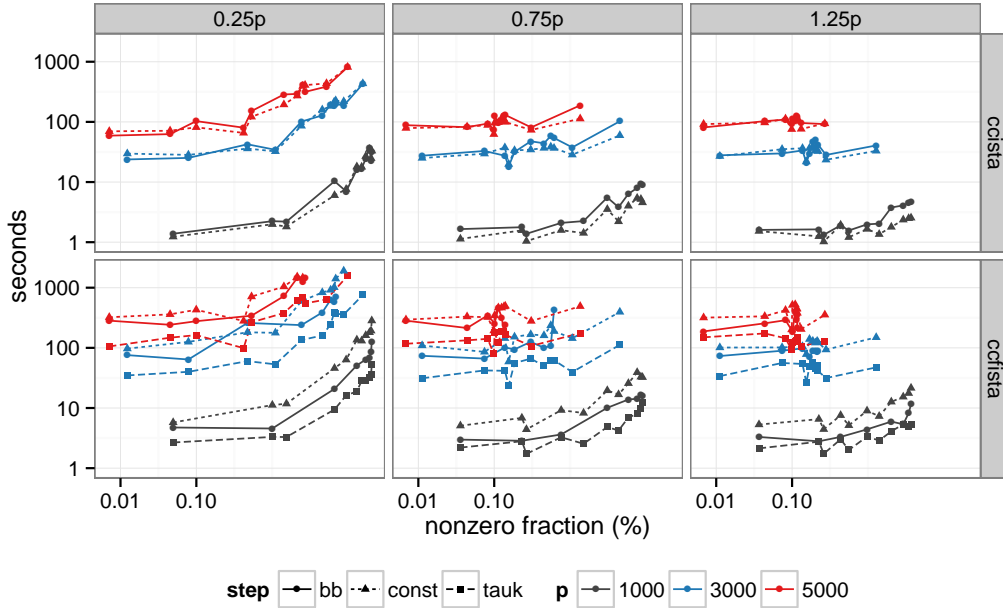

Figure 2: Timings of CONCORD-ISTA (top) and CONCORD-FISTA (bottom) variations for sample sizes  $n = \{0.25p, 0.75p, 1.25p\}$

### A.3 Comparison with CONCORD algorithm

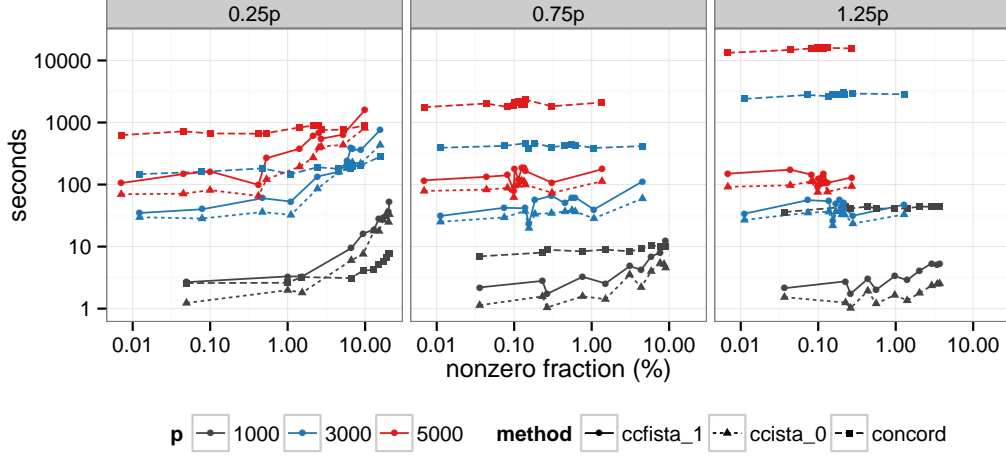

Figure 3: Timing of best CONCORD-ISTA and CONCORD-FISTA variations against CONCORD for sample sizes  $n = \{0.25p, 0.75p, 1.25p\}$ .

### A.4 Running times (Gaussian data)

Table 5:  $p = 1000$ , true non-zero fraction (nzf) of 1%

| $p$  | $n$  | $\lambda$ | nzf (%) | concord |         | ccista_0 |         | ccfista_1 |         |
|------|------|-----------|---------|---------|---------|----------|---------|-----------|---------|
|      |      |           |         | iter    | seconds | iter     | seconds | iter      | seconds |
| 1000 | 250  | 0.058     | 20.46   | 22      | 7.74    | 58       | 33.05   | 64        | 52.04   |
| 1000 | 250  | 0.059     | 20.04   | 21      | 7.70    | 55       | 24.84   | 63        | 36.13   |
| 1000 | 250  | 0.061     | 19.10   | 20      | 6.74    | 56       | 35.06   | 60        | 31.71   |
| 1000 | 250  | 0.066     | 17.05   | 17      | 5.83    | 45       | 26.86   | 54        | 28.59   |
| 1000 | 250  | 0.077     | 13.00   | 13      | 4.21    | 34       | 17.99   | 44        | 18.90   |
| 1000 | 250  | 0.103     | 6.59    | 10      | 3.11    | 22       | 6.01    | 33        | 9.44    |
| 1000 | 250  | 0.163     | 0.99    | 9       | 2.61    | 18       | 1.98    | 26        | 3.31    |
| 1000 | 250  | 0.300     | 0.05    | 9       | 2.58    | 15       | 1.23    | 23        | 2.67    |
| 1000 | 750  | 0.058     | 8.99    | 10      | 9.96    | 20       | 4.56    | 28        | 12.44   |
| 1000 | 750  | 0.059     | 8.56    | 10      | 9.86    | 20       | 5.19    | 28        | 9.86    |
| 1000 | 750  | 0.061     | 7.64    | 10      | 9.97    | 20       | 5.41    | 28        | 7.96    |
| 1000 | 750  | 0.066     | 5.86    | 10      | 10.45   | 20       | 4.01    | 27        | 6.96    |
| 1000 | 750  | 0.077     | 3.09    | 9       | 8.37    | 16       | 3.53    | 25        | 4.84    |
| 1000 | 750  | 0.103     | 0.76    | 9       | 8.40    | 15       | 1.58    | 24        | 3.26    |
| 1000 | 750  | 0.163     | 0.23    | 9       | 8.00    | 15       | 1.57    | 24        | 2.80    |
| 1000 | 750  | 0.300     | 0.04    | 8       | 6.96    | 13       | 1.13    | 18        | 2.20    |
| 1000 | 1250 | 0.058     | 3.69    | 9       | 44.21   | 15       | 2.54    | 24        | 5.29    |
| 1000 | 1250 | 0.059     | 3.43    | 9       | 44.25   | 16       | 2.49    | 24        | 5.00    |
| 1000 | 1250 | 0.061     | 2.91    | 9       | 43.84   | 16       | 2.36    | 24        | 5.38    |
| 1000 | 1250 | 0.066     | 2.03    | 9       | 44.15   | 14       | 1.79    | 24        | 4.09    |
| 1000 | 1250 | 0.077     | 0.97    | 9       | 40.50   | 15       | 1.65    | 24        | 3.34    |
| 1000 | 1250 | 0.103     | 0.44    | 9       | 44.16   | 15       | 1.93    | 24        | 3.02    |
| 1000 | 1250 | 0.163     | 0.23    | 9       | 43.84   | 13       | 1.25    | 23        | 2.75    |
| 1000 | 1250 | 0.300     | 0.04    | 8       | 35.99   | 13       | 1.53    | 17        | 2.13    |

Table 6:  $p = 3000$ , true non-zero fraction (nzf) of 0.33%

| $p$  | $n$  | $\lambda$ | nzf (%) | concord |         | ccista_0 |         | ccfista_1 |         |
|------|------|-----------|---------|---------|---------|----------|---------|-----------|---------|
|      |      |           |         | iter    | seconds | iter     | seconds | iter      | seconds |
| 3000 | 750  | 0.077     | 2.42    | 18      | 190.00  | 36       | 85.81   | 31        | 135.13  |
| 3000 | 750  | 0.103     | 0.47    | 17      | 182.36  | 28       | 36.00   | 35        | 60.13   |
| 3000 | 750  | 0.163     | 0.08    | 16      | 160.13  | 28       | 28.29   | 26        | 39.94   |
| 3000 | 750  | 0.300     | 0.01    | 15      | 147.07  | 25       | 29.67   | 23        | 34.80   |
| 3000 | 2250 | 0.058     | 0.61    | 16      | 433.05  | 27       | 36.63   | 26        | 62.26   |
| 3000 | 2250 | 0.059     | 0.56    | 16      | 434.96  | 28       | 38.50   | 26        | 61.90   |
| 3000 | 2250 | 0.061     | 0.45    | 16      | 425.58  | 28       | 36.75   | 26        | 50.02   |
| 3000 | 2250 | 0.066     | 0.30    | 16      | 400.08  | 28       | 34.55   | 34        | 66.10   |
| 3000 | 2250 | 0.077     | 0.19    | 16      | 464.53  | 28       | 33.57   | 32        | 55.90   |
| 3000 | 2250 | 0.103     | 0.14    | 16      | 462.08  | 28       | 37.39   | 24        | 41.50   |
| 3000 | 2250 | 0.163     | 0.07    | 15      | 420.28  | 26       | 29.57   | 25        | 42.17   |
| 3000 | 2250 | 0.300     | 0.01    | 14      | 391.94  | 22       | 25.06   | 22        | 31.20   |
| 3000 | 3750 | 0.058     | 0.22    | 16      | 2837.71 | 27       | 32.61   | 24        | 41.36   |
| 3000 | 3750 | 0.059     | 0.21    | 16      | 2993.98 | 27       | 33.59   | 24        | 50.58   |
| 3000 | 3750 | 0.061     | 0.20    | 16      | 2826.17 | 27       | 33.06   | 24        | 45.75   |
| 3000 | 3750 | 0.066     | 0.19    | 16      | 2805.85 | 27       | 36.94   | 31        | 57.06   |
| 3000 | 3750 | 0.077     | 0.17    | 15      | 2792.55 | 26       | 36.61   | 31        | 48.96   |
| 3000 | 3750 | 0.103     | 0.14    | 15      | 2649.75 | 26       | 36.43   | 31        | 53.95   |
| 3000 | 3750 | 0.163     | 0.07    | 15      | 2780.53 | 25       | 35.12   | 32        | 56.06   |
| 3000 | 3750 | 0.300     | 0.01    | 13      | 2406.49 | 22       | 26.91   | 22        | 33.90   |

Table 7:  $p = 5000$ , true non-zero fraction (nzf) of 0.20%

| $p$  | $n$  | $\lambda$ | nzf (%) | concord |          | ccista_0 |         | ccfista_1 |         |
|------|------|-----------|---------|---------|----------|----------|---------|-----------|---------|
|      |      |           |         | iter    | seconds  | iter     | seconds | iter      | seconds |
| 5000 | 1250 | 0.058     | 2.71    | 18      | 757.67   | 38       | 408.49  | 40        | 547.93  |
| 5000 | 1250 | 0.059     | 2.52    | 18      | 903.05   | 37       | 393.77  | 40        | 681.49  |
| 5000 | 1250 | 0.061     | 2.13    | 18      | 892.30   | 36       | 272.03  | 40        | 604.35  |
| 5000 | 1250 | 0.066     | 1.42    | 17      | 832.68   | 32       | 193.88  | 37        | 379.23  |
| 5000 | 1250 | 0.077     | 0.53    | 17      | 674.71   | 30       | 121.39  | 35        | 265.84  |
| 5000 | 1250 | 0.103     | 0.10    | 17      | 667.62   | 27       | 81.21   | 33        | 163.00  |
| 5000 | 1250 | 0.163     | 0.05    | 16      | 719.81   | 25       | 71.23   | 34        | 147.53  |
| 5000 | 1250 | 0.300     | 0.01    | 14      | 626.20   | 25       | 69.71   | 30        | 105.65  |
| 5000 | 3750 | 0.058     | 0.14    | 17      | 2324.54  | 29       | 99.50   | 35        | 165.12  |
| 5000 | 3750 | 0.059     | 0.13    | 17      | 1965.36  | 29       | 111.53  | 35        | 189.05  |
| 5000 | 3750 | 0.061     | 0.13    | 17      | 1967.39  | 29       | 114.72  | 35        | 186.34  |
| 5000 | 3750 | 0.066     | 0.11    | 17      | 2183.90  | 29       | 98.54   | 25        | 121.39  |
| 5000 | 3750 | 0.077     | 0.10    | 17      | 2094.73  | 29       | 95.84   | 33        | 178.13  |
| 5000 | 3750 | 0.103     | 0.08    | 16      | 1780.97  | 26       | 88.29   | 32        | 141.14  |
| 5000 | 3750 | 0.163     | 0.04    | 16      | 2021.49  | 25       | 82.88   | 33        | 133.36  |
| 5000 | 3750 | 0.300     | 0.01    | 14      | 1767.63  | 24       | 78.77   | 30        | 117.03  |
| 5000 | 6250 | 0.058     | 0.12    | 17      | 15698.02 | 27       | 113.65  | 25        | 150.95  |
| 5000 | 6250 | 0.059     | 0.12    | 17      | 16221.44 | 27       | 115.35  | 25        | 130.19  |
| 5000 | 6250 | 0.061     | 0.11    | 17      | 15698.53 | 27       | 103.06  | 25        | 132.57  |
| 5000 | 6250 | 0.066     | 0.11    | 17      | 16220.33 | 27       | 111.75  | 25        | 129.70  |
| 5000 | 6250 | 0.077     | 0.10    | 17      | 15671.14 | 27       | 101.03  | 25        | 123.92  |
| 5000 | 6250 | 0.103     | 0.08    | 17      | 15600.83 | 26       | 112.48  | 33        | 144.42  |
| 5000 | 6250 | 0.163     | 0.04    | 16      | 14787.78 | 26       | 97.33   | 34        | 173.66  |
| 5000 | 6250 | 0.300     | 0.01    | 14      | 13287.76 | 24       | 91.84   | 30        | 149.70  |

## A.5 Running times (t data)

Table 8:  $p = 1000$ , true non-zero fraction (nzf) of 1%

| p    | n    | $\lambda$ | NZ%  | concord |         | ccista_0 |         | ccfista_1 |         |
|------|------|-----------|------|---------|---------|----------|---------|-----------|---------|
|      |      |           |      | iter    | seconds | iter     | seconds | iter      | seconds |
| 1000 | 250  | 0.236     | 1.48 | 33      | 12.7    | 62       | 6.9     | 214       | 43.1    |
| 1000 | 250  | 0.267     | 1.05 | 31      | 17.4    | 55       | 5.5     | 201       | 39.4    |
| 1000 | 250  | 0.305     | 0.67 | 28      | 12.1    | 49       | 5.4     | 188       | 30.0    |
| 1000 | 250  | 0.350     | 0.38 | 23      | 12.8    | 44       | 4.3     | 99        | 16.6    |
| 1000 | 750  | 0.128     | 2.99 | 14      | 28.3    | 46       | 8.1     | 67        | 12.2    |
| 1000 | 750  | 0.132     | 2.77 | 14      | 30.0    | 45       | 4.5     | 66        | 11.8    |
| 1000 | 750  | 0.137     | 2.47 | 13      | 22.9    | 45       | 5.2     | 65        | 11.2    |
| 1000 | 750  | 0.146     | 2.05 | 13      | 24.2    | 44       | 4.2     | 64        | 14.3    |
| 1000 | 750  | 0.159     | 1.55 | 12      | 24.6    | 42       | 5.3     | 63        | 12.3    |
| 1000 | 750  | 0.178     | 1.02 | 11      | 17.0    | 40       | 3.4     | 59        | 6.1     |
| 1000 | 750  | 0.207     | 0.52 | 9       | 10.0    | 39       | 4.5     | 33        | 3.2     |
| 1000 | 750  | 0.250     | 0.19 | 9       | 13.9    | 38       | 2.9     | 27        | 3.1     |
| 1000 | 1250 | 0.105     | 2.96 | 11      | 99.2    | 41       | 7.6     | 56        | 9.9     |
| 1000 | 1250 | 0.107     | 2.76 | 11      | 92.2    | 41       | 4.5     | 35        | 5.8     |
| 1000 | 1250 | 0.111     | 2.50 | 10      | 91.8    | 40       | 6.2     | 35        | 5.0     |
| 1000 | 1250 | 0.116     | 2.15 | 10      | 96.6    | 40       | 6.1     | 34        | 5.1     |
| 1000 | 1250 | 0.124     | 1.70 | 9       | 85.2    | 39       | 6.1     | 34        | 4.6     |
| 1000 | 1250 | 0.136     | 1.19 | 9       | 88.3    | 38       | 5.2     | 33        | 4.0     |
| 1000 | 1250 | 0.153     | 0.71 | 9       | 75.2    | 38       | 3.1     | 32        | 6.5     |
| 1000 | 1250 | 0.180     | 0.34 | 9       | 80.1    | 37       | 3.2     | 32        | 4.8     |

Table 9:  $p = 3000$ , true non-zero fraction (nzf) of 0.33%

| p    | n    | $\lambda$ | NZ%  | concord |         | ccista_0 |         | ccfista_1 |         |
|------|------|-----------|------|---------|---------|----------|---------|-----------|---------|
|      |      |           |      | iter    | seconds | iter     | seconds | iter      | seconds |
| 3000 | 750  | 0.145     | 1.21 | 74      | 719.2   | 136      | 1185.8  | 1000      | 5625.5  |
| 3000 | 750  | 0.171     | 0.79 | 67      | 620.5   | 133      | 820.6   | 999       | 4751.7  |
| 3000 | 750  | 0.210     | 0.43 | 56      | 535.3   | 119      | 546.8   | 947       | 3864.8  |
| 3000 | 2250 | 0.090     | 1.90 | 26      | 679.4   | 73       | 545.5   | 382       | 2738.1  |
| 3000 | 2250 | 0.093     | 1.72 | 26      | 662.4   | 74       | 546.7   | 379       | 2466.8  |
| 3000 | 2250 | 0.099     | 1.49 | 25      | 635.0   | 69       | 298.9   | 208       | 1314.1  |
| 3000 | 2250 | 0.106     | 1.19 | 24      | 589.5   | 69       | 283.1   | 205       | 1068.7  |
| 3000 | 2250 | 0.118     | 0.86 | 23      | 662.9   | 69       | 260.8   | 201       | 985.9   |
| 3000 | 2250 | 0.135     | 0.53 | 22      | 624.8   | 62       | 241.6   | 197       | 745.4   |
| 3000 | 2250 | 0.161     | 0.26 | 20      | 502.4   | 63       | 183.0   | 112       | 319.8   |
| 3000 | 2250 | 0.200     | 0.10 | 15      | 421.2   | 57       | 217.7   | 95        | 284.8   |
| 3000 | 3750 | 0.080     | 1.85 | 19      | 3255.9  | 69       | 421.2   | 211       | 1374.9  |
| 3000 | 3750 | 0.081     | 1.78 | 19      | 3315.8  | 70       | 501.2   | 210       | 1389.7  |
| 3000 | 3750 | 0.083     | 1.67 | 19      | 2992.7  | 71       | 509.0   | 209       | 1429.6  |
| 3000 | 3750 | 0.086     | 1.52 | 19      | 3349.6  | 68       | 428.7   | 208       | 1441.0  |
| 3000 | 3750 | 0.090     | 1.32 | 18      | 3293.7  | 67       | 438.7   | 206       | 1229.1  |
| 3000 | 3750 | 0.096     | 1.07 | 18      | 3247.3  | 67       | 369.5   | 204       | 1248.7  |
| 3000 | 3750 | 0.106     | 0.79 | 17      | 3037.3  | 66       | 194.5   | 117       | 522.7   |
| 3000 | 3750 | 0.120     | 0.50 | 16      | 2963.8  | 61       | 170.1   | 114       | 491.4   |

Table 10:  $p = 5000$ , true non-zero fraction (nzf) of 0.20%

| p    | n    | $\lambda$ | NZ % | concord |         | ccista_0 |         | ccfista_1 |         |
|------|------|-----------|------|---------|---------|----------|---------|-----------|---------|
|      |      |           |      | iter    | seconds | iter     | seconds | iter      | seconds |
| 5000 | 1250 | 0.114     | 1.13 | 21      | 832.3   | 73       | 1088.0  | 218       | 3727.9  |
| 5000 | 1250 | 0.123     | 0.92 | 20      | 812.5   | 68       | 847.4   | 213       | 3427.7  |
| 5000 | 1250 | 0.136     | 0.67 | 18      | 808.9   | 67       | 584.0   | 208       | 3083.0  |
| 5000 | 1250 | 0.155     | 0.41 | 17      | 737.8   | 65       | 588.5   | 117       | 1733.9  |
| 5000 | 3750 | 0.090     | 0.78 | 24      | 2935.1  | 73       | 1148.9  | 355       | 5327.0  |
| 5000 | 3750 | 0.091     | 0.76 | 24      | 2881.4  | 70       | 1153.8  | 355       | 5250.8  |
| 5000 | 3750 | 0.092     | 0.74 | 24      | 3024.6  | 71       | 1054.1  | 355       | 5673.5  |
| 5000 | 3750 | 0.093     | 0.70 | 24      | 2989.9  | 72       | 1050.1  | 354       | 5324.6  |
| 5000 | 3750 | 0.095     | 0.64 | 24      | 3039.3  | 72       | 1005.6  | 203       | 2984.2  |
| 5000 | 3750 | 0.098     | 0.57 | 23      | 2814.4  | 66       | 878.8   | 202       | 2713.0  |
| 5000 | 3750 | 0.103     | 0.47 | 21      | 2468.2  | 66       | 720.9   | 200       | 2437.7  |
| 5000 | 3750 | 0.110     | 0.36 | 21      | 2549.3  | 63       | 611.6   | 198       | 2429.0  |
| 5000 | 6250 | 0.080     | 0.88 | 37      | 34226.4 | 85       | 1844.1  | 615       | 11091.0 |
| 5000 | 6250 | 0.080     | 0.88 | 37      | 33600.1 | 89       | 2018.7  | 615       | 10815.6 |
| 5000 | 6250 | 0.080     | 0.87 | 37      | 34372.5 | 87       | 1790.7  | 614       | 10930.0 |
| 5000 | 6250 | 0.081     | 0.86 | 37      | 34582.0 | 86       | 1897.3  | 614       | 10978.6 |
| 5000 | 6250 | 0.081     | 0.84 | 37      | 33310.6 | 86       | 1613.2  | 614       | 10635.1 |
| 5000 | 6250 | 0.082     | 0.82 | 37      | 34511.9 | 85       | 1469.4  | 613       | 10689.6 |
| 5000 | 6250 | 0.083     | 0.78 | 37      | 34432.1 | 88       | 1911.8  | 612       | 10615.6 |
| 5000 | 6250 | 0.085     | 0.74 | 37      | 34366.0 | 88       | 1855.4  | 609       | 10050.4 |

#### A.6 Warm start: speed-up of average compute times

Fix  $p$  and  $n$ . For each penalty parameter in a decreasing sequence  $\Lambda = \lambda_1, \lambda_2, \dots, \lambda_l$ , a CONCORD estimator  $\hat{\Omega}_{\lambda_i}$  is computed by either cold-starting from an identity matrix or warm-starting from the previously computed  $\hat{\Omega}_{\lambda_{i-1}}$ . The mean over ratios of elapsed times  $t_{\lambda_i}^{\text{warm}}/t_{\lambda_i}^{\text{cold}}$  for  $i = 1, 2, \dots, l$ , are presented as comparison in the Table 11. Note that  $t_{\lambda_i}^{\text{cold}}$  denotes running time when cold-starting, and  $t_{\lambda_i}^{\text{warm}}$  denotes running time when warm-starting. Also,  $\tau_{(0,0)} = 0.25$  and the data used is generated from a normal distribution in this section.

Table 11: Mean speed-up of warm starting from a nearby solution

| p         | 1000  |       |       | 3000  |       |       | 5000  |       |       |
|-----------|-------|-------|-------|-------|-------|-------|-------|-------|-------|
| n         | 250   | 750   | 1250  | 750   | 2250  | 3750  | 1250  | 3750  | 6250  |
| ccista_0  | 0.595 | 0.63  | 0.569 | 0.396 | 0.429 | 0.457 | 0.47  | 0.37  | 0.463 |
| ccfista_1 | 0.541 | 0.652 | 0.578 | 0.577 | 0.53  | 0.616 | 0.567 | 0.481 | 0.633 |

#### A.7 Running times (warm start)

Table 12:  $p = 1000$ , true non-zero fraction (nzf) of 1%

| ccista_0 |     |           |       |      |         |      |         |              |                 |
|----------|-----|-----------|-------|------|---------|------|---------|--------------|-----------------|
| p        | n   | $\lambda$ | NZ %  | Cold |         | Warm |         | Warm/Cold    |                 |
|          |     |           |       | iter | seconds | iter | seconds | iter (ratio) | seconds (ratio) |
| 1000     | 250 | 0.25      | 0.098 | 36   | 2.47    | 36   | 2.65    | 1.0          | 1.07            |
| 1000     | 250 | 0.21      | 0.189 | 37   | 2.62    | 25   | 1.51    | 0.7          | 0.58            |
| 1000     | 250 | 0.19      | 0.381 | 37   | 2.61    | 24   | 1.55    | 0.6          | 0.59            |
| 1000     | 250 | 0.18      | 0.641 | 38   | 2.83    | 24   | 1.69    | 0.6          | 0.60            |
| 1000     | 250 | 0.16      | 0.943 | 38   | 2.98    | 24   | 1.72    | 0.6          | 0.58            |
| 1000     | 250 | 0.16      | 1.195 | 39   | 3.79    | 23   | 1.79    | 0.6          | 0.47            |
| 1000     | 250 | 0.15      | 1.387 | 39   | 3.53    | 22   | 1.84    | 0.6          | 0.52            |
| 1000     | 250 | 0.15      | 1.540 | 40   | 5.42    | 20   | 1.86    | 0.5          | 0.34            |

| 1000             | 750  | 0.22      | 0.108 | 36   | 2.32    | 28   | 2.35    | 0.8          | 1.01            |
|------------------|------|-----------|-------|------|---------|------|---------|--------------|-----------------|
| 1000             | 750  | 0.17      | 0.204 | 37   | 2.45    | 25   | 1.68    | 0.7          | 0.69            |
| 1000             | 750  | 0.14      | 0.289 | 37   | 2.71    | 24   | 1.66    | 0.6          | 0.61            |
| 1000             | 750  | 0.12      | 0.404 | 38   | 2.84    | 23   | 1.68    | 0.6          | 0.59            |
| 1000             | 750  | 0.11      | 0.592 | 38   | 3.12    | 22   | 1.94    | 0.6          | 0.62            |
| 1000             | 750  | 0.10      | 0.883 | 39   | 3.22    | 21   | 1.69    | 0.5          | 0.52            |
| 1000             | 750  | 0.09      | 1.216 | 39   | 3.45    | 20   | 1.70    | 0.5          | 0.49            |
| 1000             | 750  | 0.09      | 1.506 | 39   | 4.07    | 19   | 2.04    | 0.5          | 0.50            |
| 1000             | 1250 | 0.20      | 0.138 | 35   | 2.52    | 30   | 2.08    | 0.9          | 0.83            |
| 1000             | 1250 | 0.15      | 0.253 | 36   | 2.75    | 25   | 1.80    | 0.7          | 0.65            |
| 1000             | 1250 | 0.12      | 0.346 | 37   | 2.91    | 24   | 1.75    | 0.6          | 0.60            |
| 1000             | 1250 | 0.10      | 0.438 | 37   | 2.91    | 23   | 1.68    | 0.6          | 0.58            |
| 1000             | 1250 | 0.09      | 0.574 | 38   | 3.66    | 22   | 1.67    | 0.6          | 0.46            |
| 1000             | 1250 | 0.08      | 0.832 | 38   | 3.86    | 21   | 1.68    | 0.6          | 0.44            |
| 1000             | 1250 | 0.07      | 1.179 | 38   | 3.36    | 20   | 1.71    | 0.5          | 0.51            |
| 1000             | 1250 | 0.07      | 1.539 | 38   | 3.48    | 19   | 1.72    | 0.5          | 0.49            |
| <b>ccfista_1</b> |      |           |       |      |         |      |         |              |                 |
| p                | n    | $\lambda$ | NZ%   | Cold |         | Warm |         | Warm/Cold    |                 |
|                  |      |           |       | iter | seconds | iter | seconds | iter (ratio) | seconds (ratio) |
| 1000             | 250  | 0.25      | 0.098 | 31   | 3.22    | 31   | 2.39    | 1.0          | 0.74            |
| 1000             | 250  | 0.21      | 0.189 | 32   | 2.89    | 19   | 1.61    | 0.6          | 0.56            |
| 1000             | 250  | 0.19      | 0.381 | 32   | 3.13    | 19   | 1.59    | 0.6          | 0.51            |
| 1000             | 250  | 0.18      | 0.641 | 33   | 3.57    | 19   | 2.27    | 0.6          | 0.64            |
| 1000             | 250  | 0.16      | 0.943 | 33   | 3.85    | 19   | 1.88    | 0.6          | 0.49            |
| 1000             | 250  | 0.16      | 1.195 | 34   | 4.39    | 19   | 2.21    | 0.6          | 0.50            |
| 1000             | 250  | 0.15      | 1.387 | 34   | 4.63    | 18   | 2.37    | 0.5          | 0.51            |
| 1000             | 250  | 0.15      | 1.540 | 34   | 4.86    | 13   | 1.82    | 0.4          | 0.37            |
| 1000             | 750  | 0.22      | 0.108 | 31   | 2.37    | 25   | 2.08    | 0.8          | 0.88            |
| 1000             | 750  | 0.17      | 0.204 | 31   | 2.38    | 19   | 2.01    | 0.6          | 0.84            |
| 1000             | 750  | 0.14      | 0.289 | 32   | 2.53    | 18   | 1.75    | 0.6          | 0.69            |
| 1000             | 750  | 0.12      | 0.404 | 32   | 3.10    | 18   | 1.84    | 0.6          | 0.59            |
| 1000             | 750  | 0.11      | 0.592 | 32   | 3.57    | 18   | 2.20    | 0.6          | 0.62            |
| 1000             | 750  | 0.10      | 0.883 | 33   | 4.09    | 18   | 2.65    | 0.5          | 0.65            |
| 1000             | 750  | 0.09      | 1.216 | 33   | 3.77    | 17   | 2.24    | 0.5          | 0.59            |
| 1000             | 750  | 0.09      | 1.506 | 33   | 4.68    | 13   | 1.66    | 0.4          | 0.36            |
| 1000             | 1250 | 0.20      | 0.138 | 31   | 2.88    | 25   | 2.23    | 0.8          | 0.78            |
| 1000             | 1250 | 0.15      | 0.253 | 31   | 3.05    | 23   | 2.08    | 0.7          | 0.68            |
| 1000             | 1250 | 0.12      | 0.346 | 32   | 3.12    | 18   | 1.74    | 0.6          | 0.56            |
| 1000             | 1250 | 0.10      | 0.438 | 32   | 3.26    | 18   | 2.21    | 0.6          | 0.68            |
| 1000             | 1250 | 0.09      | 0.574 | 32   | 3.70    | 18   | 2.22    | 0.6          | 0.60            |
| 1000             | 1250 | 0.08      | 0.832 | 32   | 4.35    | 17   | 1.88    | 0.5          | 0.43            |
| 1000             | 1250 | 0.07      | 1.179 | 32   | 4.38    | 17   | 2.59    | 0.5          | 0.59            |
| 1000             | 1250 | 0.07      | 1.539 | 33   | 5.28    | 12   | 1.64    | 0.4          | 0.31            |

Table 12:  $p = 1000$

Table 13:  $p = 3000$ , true non-zero fraction (nzf) of 0.33%

| <b>ccista_0</b> |     |           |       |      |         |      |         |              |                 |
|-----------------|-----|-----------|-------|------|---------|------|---------|--------------|-----------------|
| p               | n   | $\lambda$ | NZ%   | Cold |         | Warm |         | Warm/Cold    |                 |
|                 |     |           |       | iter | seconds | iter | seconds | iter (ratio) | seconds (ratio) |
| 3000            | 750 | 0.16      | 0.081 | 61   | 69.93   | 61   | 54.15   | 1.0          | 0.77            |
| 3000            | 750 | 0.14      | 0.118 | 62   | 75.70   | 26   | 23.93   | 0.4          | 0.32            |
| 3000            | 750 | 0.12      | 0.199 | 63   | 69.40   | 24   | 23.77   | 0.4          | 0.34            |
| 3000            | 750 | 0.11      | 0.359 | 64   | 69.55   | 23   | 27.91   | 0.4          | 0.40            |
| 3000            | 750 | 0.10      | 0.565 | 64   | 77.40   | 22   | 27.72   | 0.3          | 0.36            |
| 3000            | 750 | 0.10      | 0.773 | 65   | 87.29   | 22   | 29.48   | 0.3          | 0.34            |
| 3000            | 750 | 0.09      | 0.956 | 65   | 88.04   | 21   | 27.87   | 0.3          | 0.32            |

| 3000             | 750  | 0.09      | 1.100 | 65   | 100.89  | 20   | 32.62   | 0.3          | 0.32            |
|------------------|------|-----------|-------|------|---------|------|---------|--------------|-----------------|
| 3000             | 2250 | 0.13      | 0.107 | 58   | 57.99   | 37   | 40.45   | 0.6          | 0.70            |
| 3000             | 2250 | 0.10      | 0.139 | 60   | 58.61   | 25   | 29.16   | 0.4          | 0.50            |
| 3000             | 2250 | 0.08      | 0.164 | 60   | 62.71   | 24   | 25.49   | 0.4          | 0.41            |
| 3000             | 2250 | 0.07      | 0.214 | 61   | 80.81   | 22   | 25.52   | 0.4          | 0.32            |
| 3000             | 2250 | 0.06      | 0.340 | 61   | 70.90   | 21   | 31.30   | 0.3          | 0.44            |
| 3000             | 2250 | 0.06      | 0.554 | 62   | 79.03   | 20   | 31.01   | 0.3          | 0.39            |
| 3000             | 2250 | 0.06      | 0.816 | 62   | 93.76   | 19   | 31.05   | 0.3          | 0.33            |
| 3000             | 2250 | 0.05      | 1.068 | 62   | 92.50   | 18   | 32.08   | 0.3          | 0.35            |
| 3000             | 3750 | 0.11      | 0.129 | 57   | 59.35   | 36   | 51.36   | 0.6          | 0.87            |
| 3000             | 3750 | 0.09      | 0.160 | 58   | 64.93   | 25   | 31.96   | 0.4          | 0.49            |
| 3000             | 3750 | 0.07      | 0.182 | 59   | 74.21   | 23   | 31.19   | 0.4          | 0.42            |
| 3000             | 3750 | 0.06      | 0.222 | 59   | 76.23   | 21   | 28.95   | 0.4          | 0.38            |
| 3000             | 3750 | 0.05      | 0.346 | 60   | 71.07   | 20   | 29.43   | 0.3          | 0.41            |
| 3000             | 3750 | 0.05      | 0.597 | 60   | 77.98   | 19   | 29.11   | 0.3          | 0.37            |
| 3000             | 3750 | 0.04      | 0.936 | 60   | 88.24   | 19   | 29.18   | 0.3          | 0.33            |
| 3000             | 3750 | 0.04      | 1.284 | 60   | 90.95   | 18   | 34.66   | 0.3          | 0.38            |
| <b>ccfista_1</b> |      |           |       |      |         |      |         |              |                 |
| p                | n    | $\lambda$ | NZ%   | Cold |         | Warm |         | Warm/Cold    |                 |
|                  |      |           |       | iter | seconds | iter | seconds | iter (ratio) | seconds (ratio) |
| 3000             | 750  | 0.16      | 0.081 | 34   | 40.35   | 34   | 45.74   | 1.0          | 1.13            |
| 3000             | 750  | 0.14      | 0.118 | 34   | 41.53   | 18   | 22.15   | 0.5          | 0.53            |
| 3000             | 750  | 0.12      | 0.199 | 35   | 49.90   | 18   | 26.05   | 0.5          | 0.52            |
| 3000             | 750  | 0.11      | 0.359 | 35   | 47.69   | 18   | 28.30   | 0.5          | 0.59            |
| 3000             | 750  | 0.10      | 0.565 | 35   | 56.61   | 18   | 29.63   | 0.5          | 0.52            |
| 3000             | 750  | 0.10      | 0.773 | 35   | 61.02   | 18   | 33.02   | 0.5          | 0.54            |
| 3000             | 750  | 0.09      | 0.956 | 35   | 64.17   | 13   | 24.45   | 0.4          | 0.38            |
| 3000             | 750  | 0.09      | 1.101 | 35   | 76.27   | 13   | 29.42   | 0.4          | 0.39            |
| 3000             | 2250 | 0.13      | 0.107 | 33   | 43.32   | 24   | 37.58   | 0.7          | 0.87            |
| 3000             | 2250 | 0.10      | 0.139 | 34   | 43.70   | 18   | 24.62   | 0.5          | 0.56            |
| 3000             | 2250 | 0.08      | 0.164 | 34   | 51.12   | 18   | 30.03   | 0.5          | 0.59            |
| 3000             | 2250 | 0.07      | 0.214 | 34   | 52.91   | 18   | 30.79   | 0.5          | 0.58            |
| 3000             | 2250 | 0.06      | 0.340 | 34   | 51.43   | 12   | 19.57   | 0.4          | 0.38            |
| 3000             | 2250 | 0.06      | 0.554 | 35   | 58.52   | 12   | 26.53   | 0.3          | 0.45            |
| 3000             | 2250 | 0.06      | 0.816 | 35   | 75.48   | 12   | 30.24   | 0.3          | 0.40            |
| 3000             | 2250 | 0.05      | 1.068 | 35   | 68.77   | 12   | 27.62   | 0.3          | 0.40            |
| 3000             | 3750 | 0.11      | 0.129 | 33   | 44.35   | 24   | 47.73   | 0.7          | 1.08            |
| 3000             | 3750 | 0.09      | 0.160 | 33   | 46.90   | 18   | 29.62   | 0.5          | 0.63            |
| 3000             | 3750 | 0.07      | 0.182 | 34   | 54.05   | 18   | 34.39   | 0.5          | 0.64            |
| 3000             | 3750 | 0.06      | 0.222 | 34   | 47.73   | 17   | 33.91   | 0.5          | 0.71            |
| 3000             | 3750 | 0.05      | 0.346 | 34   | 52.95   | 12   | 29.32   | 0.4          | 0.55            |
| 3000             | 3750 | 0.05      | 0.597 | 34   | 62.71   | 12   | 25.86   | 0.4          | 0.41            |
| 3000             | 3750 | 0.04      | 0.936 | 34   | 68.09   | 12   | 32.02   | 0.4          | 0.47            |
| 3000             | 3750 | 0.04      | 1.284 | 34   | 73.68   | 12   | 32.05   | 0.4          | 0.43            |

Table 14:  $p = 5000$ , true non-zero fraction (nzf) of 0.20%

| <b>ccista_0</b> |      |           |       |      |         |      |         |              |                 |
|-----------------|------|-----------|-------|------|---------|------|---------|--------------|-----------------|
| p               | n    | $\lambda$ | NZ%   | Cold |         | Warm |         | Warm/Cold    |                 |
|                 |      |           |       | iter | seconds | iter | seconds | iter (ratio) | seconds (ratio) |
| 5000            | 1250 | 0.10      | 0.100 | 59   | 170.54  | 59   | 178.09  | 1.0          | 1.04            |
| 5000            | 1250 | 0.09      | 0.190 | 60   | 190.78  | 23   | 81.75   | 0.4          | 0.43            |
| 5000            | 1250 | 0.08      | 0.379 | 60   | 209.50  | 23   | 88.74   | 0.4          | 0.42            |
| 5000            | 1250 | 0.08      | 0.630 | 61   | 235.14  | 23   | 97.53   | 0.4          | 0.41            |
| 5000            | 1250 | 0.07      | 0.888 | 61   | 297.15  | 22   | 111.51  | 0.4          | 0.38            |
| 5000            | 1250 | 0.07      | 1.112 | 61   | 304.91  | 22   | 120.28  | 0.4          | 0.39            |
| 5000            | 1250 | 0.07      | 1.289 | 61   | 320.62  | 21   | 110.85  | 0.3          | 0.35            |

| 5000             | 1250 | 0.07      | 1.421 | 61   | 302.57  | 19   | 100.33  | 0.3          | 0.33            |
|------------------|------|-----------|-------|------|---------|------|---------|--------------|-----------------|
| 5000             | 3750 | 0.08      | 0.102 | 60   | 213.08  | 25   | 100.04  | 0.4          | 0.47            |
| 5000             | 3750 | 0.06      | 0.118 | 60   | 213.48  | 22   | 82.87   | 0.4          | 0.39            |
| 5000             | 3750 | 0.05      | 0.173 | 61   | 222.05  | 21   | 82.29   | 0.3          | 0.37            |
| 5000             | 3750 | 0.05      | 0.323 | 61   | 272.23  | 20   | 78.67   | 0.3          | 0.29            |
| 5000             | 3750 | 0.04      | 0.568 | 61   | 245.31  | 20   | 93.27   | 0.3          | 0.38            |
| 5000             | 3750 | 0.04      | 0.856 | 61   | 272.03  | 19   | 94.39   | 0.3          | 0.35            |
| 5000             | 3750 | 0.04      | 1.130 | 62   | 332.37  | 18   | 111.98  | 0.3          | 0.34            |
| 5000             | 3750 | 0.04      | 1.359 | 62   | 312.75  | 17   | 117.58  | 0.3          | 0.38            |
| 5000             | 6250 | 0.08      | 0.101 | 60   | 201.55  | 27   | 113.80  | 0.5          | 0.56            |
| 5000             | 6250 | 0.06      | 0.117 | 61   | 197.77  | 23   | 102.70  | 0.4          | 0.52            |
| 5000             | 6250 | 0.05      | 0.144 | 62   | 188.22  | 22   | 107.47  | 0.4          | 0.57            |
| 5000             | 6250 | 0.04      | 0.308 | 62   | 224.07  | 21   | 97.97   | 0.3          | 0.44            |
| 5000             | 6250 | 0.03      | 0.844 | 62   | 301.96  | 21   | 118.37  | 0.3          | 0.39            |
| 5000             | 6250 | 0.03      | 1.757 | 63   | 338.19  | 22   | 147.29  | 0.3          | 0.44            |
| 5000             | 6250 | 0.03      | 2.828 | 63   | 445.84  | 22   | 171.05  | 0.3          | 0.38            |
| 5000             | 6250 | 0.03      | 3.845 | 63   | 508.81  | 22   | 202.41  | 0.3          | 0.40            |
| <b>ccfista_1</b> |      |           |       |      |         |      |         |              |                 |
| p                | n    | $\lambda$ | NZ%   | Cold |         | Warm |         | Warm/Cold    |                 |
|                  |      |           |       | iter | seconds | iter | seconds | iter (ratio) | seconds (ratio) |
| 5000             | 1250 | 0.10      | 0.100 | 34   | 116.29  | 34   | 122.71  | 1.0          | 1.06            |
| 5000             | 1250 | 0.09      | 0.190 | 34   | 146.35  | 18   | 82.83   | 0.5          | 0.57            |
| 5000             | 1250 | 0.08      | 0.379 | 35   | 185.02  | 18   | 95.04   | 0.5          | 0.51            |
| 5000             | 1250 | 0.08      | 0.630 | 35   | 188.99  | 18   | 111.21  | 0.5          | 0.59            |
| 5000             | 1250 | 0.07      | 0.888 | 35   | 241.79  | 18   | 121.71  | 0.5          | 0.50            |
| 5000             | 1250 | 0.07      | 1.112 | 35   | 261.39  | 18   | 144.55  | 0.5          | 0.55            |
| 5000             | 1250 | 0.07      | 1.289 | 36   | 259.91  | 13   | 96.61   | 0.4          | 0.37            |
| 5000             | 1250 | 0.07      | 1.421 | 36   | 268.20  | 13   | 103.76  | 0.4          | 0.39            |
| 5000             | 3750 | 0.08      | 0.102 | 34   | 131.40  | 23   | 101.62  | 0.7          | 0.77            |
| 5000             | 3750 | 0.06      | 0.118 | 35   | 142.58  | 18   | 83.89   | 0.5          | 0.59            |
| 5000             | 3750 | 0.05      | 0.173 | 35   | 146.11  | 12   | 64.77   | 0.3          | 0.44            |
| 5000             | 3750 | 0.05      | 0.323 | 35   | 204.83  | 12   | 66.64   | 0.3          | 0.33            |
| 5000             | 3750 | 0.04      | 0.568 | 35   | 213.24  | 12   | 78.30   | 0.3          | 0.37            |
| 5000             | 3750 | 0.04      | 0.856 | 35   | 230.24  | 12   | 93.24   | 0.3          | 0.40            |
| 5000             | 3750 | 0.04      | 1.130 | 35   | 232.96  | 12   | 113.18  | 0.3          | 0.49            |
| 5000             | 3750 | 0.04      | 1.359 | 35   | 269.01  | 12   | 124.06  | 0.3          | 0.46            |
| 5000             | 6250 | 0.08      | 0.101 | 35   | 141.06  | 24   | 115.84  | 0.7          | 0.82            |
| 5000             | 6250 | 0.06      | 0.117 | 35   | 138.92  | 18   | 100.40  | 0.5          | 0.72            |
| 5000             | 6250 | 0.05      | 0.144 | 35   | 140.20  | 18   | 107.38  | 0.5          | 0.77            |
| 5000             | 6250 | 0.04      | 0.308 | 35   | 185.94  | 17   | 102.35  | 0.5          | 0.55            |
| 5000             | 6250 | 0.03      | 0.844 | 36   | 252.19  | 18   | 147.24  | 0.5          | 0.58            |
| 5000             | 6250 | 0.03      | 1.758 | 36   | 314.23  | 18   | 196.23  | 0.5          | 0.62            |
| 5000             | 6250 | 0.03      | 2.828 | 36   | 477.69  | 18   | 230.70  | 0.5          | 0.48            |
| 5000             | 6250 | 0.03      | 3.845 | 36   | 551.26  | 18   | 282.35  | 0.5          | 0.51            |

## A.8 Other Methods

### A.8.1 Dual problem of CONCORD

Formulating the dual using the matrix form is challenging since the KKT conditions involving the gradient term  $S\Omega + \Omega S$  do not have a closed form solution as in the case of Gaussian problem in [2]. Therefore, we consider a vector form of the CONCORD problem by defining two new variables  $x_1 \in \mathbb{R}^p$  and  $x_2 \in \mathbb{R}^{p(p-1)/2}$  as

$$\begin{aligned} x_1 &= (\omega_{11}, \omega_{22}, \dots, \omega_{pp})^T \\ x_2 &= (\omega_{12}, \omega_{13}, \dots, \omega_{1p}, \omega_{23}, \dots, \omega_{2p}, \dots, \omega_{p-1p})^T. \end{aligned} \quad (21)$$



We define two coefficient matrices  $A_1, A_2$  as

$$A_1 = \begin{bmatrix} Y_1 & & & \\ & Y_2 & & \\ & & \ddots & \\ & & & Y_p \end{bmatrix}, A_2 = \begin{bmatrix} Y_2 & Y_3 & \cdots & Y_p & & & \\ Y_1 & & & & Y_3 & \cdots & Y_p \\ & Y_1 & & & Y_2 & & \\ & & \ddots & & & \ddots & \\ & & & Y_1 & & & \\ & & & & Y_2 & & \\ & & & & & \ddots & \\ & & & & & & Y_{p-1} & Y_p \\ & & & & & & Y_{p-2} & Y_p \\ & & & & & & & Y_p \\ & & & & & & & Y_{p-2} & Y_p \\ & & & & & & & & Y_p \end{bmatrix}, \quad (22)$$

where  $A_1$  is  $n \times p$  and  $A_2$  is  $n \times p(p-1)/2$  dimensional matrices. Using these definitions, the CONCORD problem (4) can be rewritten as

$$\underset{x_1, x_2}{\text{minimize}} \quad -n \log x_1 + \frac{1}{2} \|A_1 x_1 + A_2 x_2\|^2 + \lambda \|x_2\|_1. \quad (23)$$

where,  $\log(x_1) = \sum_{i=1}^p \log(x_{1i})$ . We will use  $x = \begin{bmatrix} x_1 \\ x_2 \end{bmatrix}$  for simplicity of notation where ever possible.

The transformed CONCORD problem in (23) can be written in composite form using a new variable  $z = A_1 x_1 + A_2 x_2$  as

$$\begin{aligned} &\underset{x_1, x_2, z}{\text{minimize}} \quad -n \log x_1 + \frac{1}{2} \|z\|^2 + \lambda \|x_2\|_1 \\ &\text{subject to} \quad A_1 x_1 + A_2 x_2 = z \end{aligned} \quad (24)$$

The Lagrangian for this problem is given by

$$\mathcal{L}(x_1, x_2, z, y) = -n \log x_1 + \frac{1}{2} \|z\|^2 + \lambda \|x_2\|_1 + y^T (A_1 x_1 + A_2 x_2 - z). \quad (25)$$

Maximizing with respect to the three primal variables yields following optimality conditions (the notation is adapted from MATLAB to denote element-wise operations),

$$\begin{aligned} z - y &= 0 \\ -n./x_1 + A_1^T y &= 0 \\ \lambda \text{sign}(x_2) + A_2^T y &\geq 0. \end{aligned} \quad (26)$$

Substituting these the dual problem can be written as

$$\begin{aligned} &\underset{y}{\text{maximize}} \quad -n \log n./A_1^T y + \frac{1}{2} \|y\|^2 + y^T (A_1(n./A_1^T y) - y) \\ &\text{subject to} \quad \|A_2^T y\|_\infty \leq \lambda, \end{aligned}$$

or equivalently

$$\begin{aligned} &\underset{y}{\text{maximize}} \quad \frac{1}{2} \|y\|^2 - n \log (A_1^T y) + c \\ &\text{subject to} \quad \|A_2^T y\|_\infty \leq \lambda, \end{aligned} \quad (27)$$

where,  $c = n \log n - n^2$  is a constant. This problem can also be written in composite form as

$$\begin{aligned} &\underset{y}{\text{maximize}} \quad \frac{1}{2} \|y\|^2 - n \log (A_1^T y) + \mathbb{1}_{\|w\|_\infty \leq \lambda} \\ &\text{subject to} \quad A_2^T y - w = 0. \end{aligned} \quad (28)$$

The gradient and hessian of the smooth function  $h(y) = \frac{1}{2} \|y\|^2 - n \log (A_1^T y)$  is given by

$$\begin{aligned} \nabla h(y) &= y - A_1(n./A_1^T y), \\ \nabla^2 h(y) &= I + A_1 \text{diag}(n./(A_1^T y)^2) A_1^T. \end{aligned} \quad (29)$$

Here, the hessian is bounded away from the semi-definite boundary. Hence the function  $h$  is strongly convex with parameter 1. Moreover, on lines of Theorem 3.1, we can show that if  $y$  is restricted to

a convex level set  $\mathcal{C} = \{y | h(y) \leq M\}$  for some constant  $M$ , then the function  $h$  has a Lipschitz continuous gradient. Note that

$$\begin{aligned} -n \log(A_1^T y) &\leq h(y) \leq M \\ e^{-\frac{M}{n}} &\leq A_1^T y. \end{aligned} \quad (30)$$

Therefore, the hessian satisfies

$$\nabla^2 h(y) = I + A_1 \text{diag}(n./(A_1^T y)^2) A_1^T \preceq (1 + n\rho(A_1^T A_1) e^{\frac{2M}{n}}) I. \quad (31)$$

To conclude, the dual problem provides an alternate method to prove the  $\mathcal{O}(\frac{1}{k})$  and  $\mathcal{O}(\frac{1}{k^2})$  rates of convergence for CONCORD problem.

### A.8.2 Proximal Newton's Algorithm for CONCORD

Recall that the hessian of the smooth function  $h_1$  as given in 6 is

$$\nabla^2 h_1(\Omega) = \sum_{i=1}^{i=p} \omega_{ii}^{-2} [e_i e_i^T \otimes e_i e_i^T] + \frac{1}{2} (S \otimes I + I \otimes S).$$

The subproblem solved for the direction of descent for the second order PNOPT algorithm is given by

$$\Delta\Omega^{(k)} = \arg \min_W \langle G^{(k)}, W \rangle + \frac{1}{2} \sum_{i=1}^{i=p} \omega_{ii}^{-2} \text{tr}(W e_i e_i^T W e_i e_i^T) + \text{tr}(W S W) + \lambda \|\Omega_X^{(k)} + W\|_1. \quad (32)$$

Using these, the matrix version of the second order algorithm is given in Algorithm 3. Here, the subproblem for the descent step is as a huge Lasso problem. This can be solved by standard Lasso packages which uses coordinate descent methods.

---

#### Algorithm 3 CONCORD - Proximal Newton Optimization Matrix form (CONCORD-PNOPT)

---

Initialize:  $\Omega^{(0)} \in \mathbb{S}_+^p$ ,  $\tau_{(0,0)} = 1$ ,  $\Delta_{\text{opt}} = 2\epsilon_{\text{opt}}$  and  $\Delta_{\text{term}} = 2\epsilon_{\text{term}}$

**while**  $\Delta_{\text{subg}} > \epsilon_{\text{subg}}$  **or**  $\Delta_{\text{term}} > \epsilon_{\text{term}}$  **do**

    Compute  $\nabla h_1$ :

$$G^{(k)} = \Omega_D^{-1} + \frac{1}{2} \left( S \Omega^{(k)} + \Omega^{(k)} S \right)$$

    Compute Newton step:

$$\Delta\Omega^{(k)} = \arg \min_W \langle G^{(k)}, W \rangle + \frac{1}{2} \sum_{i=1}^{i=p} \omega_{ii}^{-2} \text{tr}(W e_i e_i^T W e_i e_i^T) + \text{tr}(W S W) + \lambda \|\Omega_X^{(k)} + W\|_1$$

    Compute sufficient descent  $\Delta^{(k)}$ :

$$\Delta^{(k)} = \langle G^{(k)}, \Delta\Omega^{(k)} \rangle + \lambda \left( \|\Omega_X^{(k)} + \Delta\Omega_X^{(k)}\|_1 - \|\Omega_X^{(k)}\|_1 \right)$$

    Compute  $\tau_k$ , such that  $Q_{\text{con}}(\Omega^{(k+1)}) \leq Q_{\text{con}}(\Omega^{(k)}) + \alpha \tau_k \Delta^{(k)}$ .

    Update:  $\Omega^{(k+1)} = \Omega^{(k)} + \tau_k \Delta\Omega^{(k)}$

    Compute convergence criteria:

$$\Delta_{\text{subg}} = \frac{\|\nabla h(\Omega^{(k)}) + \partial g(\Omega^{(k)})\|}{\|\Omega^{(k)}\|}, \quad \Delta_{\text{term}} = \frac{\|f(\Omega^{(k+1)}) - f(\Omega^{(k)})\|}{\|f(\Omega^{(k)})\|}$$

**end while**

---
